# Supplementary material for: Mapping odorant sensitivities reveals a sparse but structured representation of olfactory chemical space by sensory input to the mouse olfactory bulb
Source: eLife. 2022 Jul 21;11:e80470. doi: 10.7554/eLife.80470 (PMC9352350; doi:10.7554/eLife.80470)
Supplement: Figure 1—figure supplement 2—source data 1. [file elife-80470-fig1-figsupp2-data1.xlsx]

## Sheet: study comparisons
		Ma et al.	Burton et al.	Soucy et al.	Chae et al.	Davison et al.	Pashkovski et al.
Odorant	Odor ID	ppm	ppm	ppm	ppm	10 ppm	100 ppm
butyric acid	1	5.90468	0.000392545	#VALUE!	#VALUE!
2-methylbutyric acid	2	0.17604	0.000133656	#VALUE!	#VALUE!
valeric acid	3	0.0702938	0.000133656	1.40587	1.40587
hexanoic acid	5	NaN	0.000518413	0.311738	0.311738
heptanoic acid	4	0.383865	0.00218268	0.076773	#VALUE!
butyraldehyde	139	34.7801	0.147896	695.603	#VALUE!
2-methylbutyraldehyde	9	3.67972	0.00191409	#VALUE!	#VALUE!
trans-2-methyl-2-butenal	10	6.29587	0.000326432	#VALUE!	#VALUE!
valeraldehyde	16	9.0465	0.058834	180.93	180.93
isovaleraldehyde	15	16.8094	0.0901423	#VALUE!	#VALUE!
hexanal	14	3.99757	0.0176343	#VALUE!	79.9515
heptanal	11	1.25917	0.0653817	25.1835	25.1835
octanal	12	0.422985	0.0277451	8.4597	#VALUE!
butyl acetate	18	40.6481	0.0218617	81.2963	#VALUE!
isoamyl acetate	28	1.99267	0.0105018	39.8535	39.8535
ethyl butyrate	19	4.51714	0.026728	90.3428	90.3428
vinyl butyrate	20	4.27264	0.00222209	#VALUE!	#VALUE!
methyl valerate	21	6.66263	0.0205935	#VALUE!	#VALUE!
methyl tiglate	130	NaN	0.000245317	47.3107	47.3107
ethyl tiglate	22	1.08191	5.6323e-05	21.6382	21.6382
isopropyl tiglate	27	0.996337	0.000516824	19.9267	#VALUE!
hexyl tiglate	23	NaN	0.00970078	0.551347	#VALUE!
difurfuryl disulfide	186	NaN	8.58195e-06	0.005379	#VALUE!
2-butanone	33	290.344	0.0162676	#VALUE!	#VALUE!
2-pentanone	34	12.1639	0.0698952	#VALUE!	#VALUE!
2-hexanone	29	4.10149	0.024929	82.0298	82.0298
2-octanone	30	4.83499	0.00348046	#VALUE!	#VALUE!
2-nonanone	119	22.3717	0.0120243	#VALUE!	#VALUE!
1-hexanol	40	NaN	0.0164201	6.6504	#VALUE!
geraniol	42	NaN	0.0296586	0.21516	#VALUE!
butylamine	122	2970.68	0.0154443	594.135	#VALUE!
isopentylamine	46	15.0979	0.000784454	301.958	#VALUE!
cyclohexylamine	43	357.581	0.00154094	#VALUE!	#VALUE!
phenethylamine	44	NaN	7.6284e-06	2.934	#VALUE!
2-acetylpyridine	160	NaN	0.00896973	3.85088	#VALUE!
indole	75	NaN	0.00227612	0.087531	#VALUE!
2-acetylpyrazine	165	NaN	0.0350589	0.509783	#VALUE!
2-methylpyrazine	177	NaN	0.00178505	57.213	#VALUE!
2-methoxypyrazine	175	NaN	0.000786043	11.4548	#VALUE!
2-ethylpyrazine	179	NaN	0.000742498	25.5503	#VALUE!
2,3-diethylpyrazine	50	NaN	0.15581	5.56238	5.56238
2-methoxy-3-methylpyrazine	51	NaN	0.00108864	4.19318	#VALUE!
2-ethyl-3-methylpyrazine	53	NaN	0.00113345	4.36433	#VALUE!
2,3-dimethylpyrazine	167	NaN	0.0640468	19.56	#VALUE!
2,5-dimethylpyrazine	168	NaN	0.00738683	22.7385	#VALUE!
2,6-dimethylpyrazine	124	NaN	0.0718977	12.4695	#VALUE!
2,3,5-trimethylpyrazine	125	NaN	0.000321029	10.3913	#VALUE!
2,3,5,6-tetramethylpyrazine	116	NaN	0.125074	1.05502	#VALUE!
2-isobutyl-3-methylpyrazine	171	NaN	0.0056323	0.789735	#VALUE!
5,6,7,8-tetrahydroquinoxaline	114	NaN	0.0102602	0.667485	#VALUE!
benzaldehyde	57	0.45477	0.00188199	9.0954	#VALUE!
cuminaldehyde	58	NaN	0.0109499	#VALUE!	0.421762
p-anisaldehyde	146	NaN	0.000186324	0.235942	0.235942
acetophenone	67	1.42421	0.000608047	2.84842	2.84842
4-methoxyacetophenone	77	NaN	1.11947e-05	0.0462105	#VALUE!
butyrophenone	152	NaN	0.00136199	0.60636	#VALUE!
phenylacetate	163	NaN	7.79368e-05	2.86065	#VALUE!
4-methylanisole	65	0.429709	0.00223544	#VALUE!	#VALUE!
eugenol	62	NaN	1.76884e-05	0.086064	#VALUE!
isoeugenol	200	NaN	1.86578e-05	0.086064	#VALUE!
2-isobutylthiazole	81	0.0666262	7.44087e-05	1.33252	1.33252
2-acetylthiazole	82	NaN	0.00345185	2.61615	#VALUE!
2,4,5-trimethylthiazole	87	NaN	0.000110548	1.54035	1.54035
L-carvone	38	NaN	0.0024252	0.760395	#VALUE!
beta-ionone	35	NaN	0.00317183	0.0918098	#VALUE!
