# Supplementary material for: Mapping odorant sensitivities reveals a sparse but structured representation of olfactory chemical space by sensory input to the mouse olfactory bulb
Source: eLife. 2022 Jul 21;11:e80470. doi: 10.7554/eLife.80470 (PMC9352350; doi:10.7554/eLife.80470)
Supplement: Figure 1—source data 1. [file elife-80470-fig1-data1.xlsx]

## Sheet: Fig 1C
Odorant	Est. Conc. (mols/L)		ppb = (mols/L) * 24.45 * 1e9
	Mouse 1	Mouse 2	Mouse 3	Mouse 4			Minimal Concentrations (mols/L)
propionic acid	1.8252e-11	1.8252e-11	1.8252e-11	1.8252e-11
butyric acid	1.6055e-11	1.6055e-11	1.6055e-11	1.6055e-11
2-methylbutyric acid	5.4665e-12	5.4665e-12	5.4665e-12	5.4665e-12
valeric acid	5.4665e-12	5.4665e-12	5.4665e-12	5.4665e-12
isovaleric acid	8.6866e-12	8.6866e-12	8.6866e-12	8.6866e-12
2-methyl-2-pentenoic acid	4.1964e-14	4.1964e-14	4.1964e-14	4.1964e-14
hexanoic acid	2.1203e-11	2.1203e-11	2.1203e-11	2.1203e-11
heptanoic acid	8.9271e-11	8.9271e-11	8.9271e-11	8.9271e-11
methacrolein	9.8241e-10	9.8241e-10	9.8241e-10	9.8241e-10
butyraldehyde	6.0489e-09	6.0489e-09	6.0489e-09	6.0489e-09
isobutyraldehyde	1.07536e-09	1.07536e-09	1.07536e-09	1.07536e-09
2-methylbutyraldehyde	7.8286e-11	7.8286e-11	7.8286e-11	7.8286e-11
trans-2-methyl-2-butenal	1.3351e-11	1.3351e-11	1.3351e-11	1.3351e-11
methional	1.24956e-11	1.24956e-11	1.24956e-11	1.24956e-11
valeraldehyde	2.4063e-09	2.4063e-09	2.4063e-10	2.4063e-09
isovaleraldehyde	3.6868e-09	3.6868e-09	3.6868e-09	3.6868e-09
2-methylvaleraldehyde	1.3351e-10	1.3351e-10	1.3351e-10	1.3351e-10
2-methyl-2-pentenal	5.5484e-11	5.5484e-11	5.5484e-11	5.5484e-11
hexanal	7.2124e-10	7.2124e-10	7.2124e-10	7.2124e-10
heptanal	2.6741e-10	2.6741e-09	2.6741e-09	2.6741e-09
octanal	1.13477e-09	1.13477e-09	1.13477e-09	1.13477e-09
trans-2-nonenal	2.418e-09	2.418e-09	2.418e-09	2.418e-09
trans-2,cis-6-nonadienal	2.1359e-09	2.1359e-09	2.1359e-09	2.1359e-09
trans-2-dodecenal	7.631e-10	7.631e-10	7.631e-10	7.631e-10
2-hexyl-2-decenal	5.1129e-09	5.1129e-09	5.1129e-09	5.1129e-09
butyl acetate	8.9414e-10	8.9414e-10	8.9414e-10	8.9414e-10
S-methyl thiobutanoate	1.8486e-10	1.8486e-10	1.8486e-10	1.8486e-10
isoamyl acetate	4.2952e-10	4.2952e-10	4.2952e-10	4.2952e-10
hexyl acetate	1.10435e-09	1.10435e-09	1.10435e-09	1.10435e-09
3-mercaptohexyl acetate	3.7388e-12	3.7388e-12	3.7388e-12	3.7388e-12
ethyl butyrate	1.09317e-09	1.09317e-09	1.09317e-09	1.09317e-09
methyl 2-methylbutyrate	1.599e-10	1.599e-10	1.599e-10	1.599e-10
vinyl butyrate	9.0883e-11	9.0883e-11	9.0883e-11	9.0883e-11
methyl valerate	8.4227e-10	8.4227e-10	8.4227e-10	8.4227e-10
1-octen-3-yl butyrate	4.4564e-09	4.4564e-09	4.4564e-09	4.4564e-09
methyl tiglate	1.00334e-11	1.00334e-11	1.00334e-11	1.00334e-11
ethyl tiglate	2.3036e-12	2.3036e-12	2.3036e-12	2.3036e-12
isopropyl tiglate	2.1138e-11	2.1138e-11	2.1138e-11	2.1138e-11
hexyl tiglate	3.9676e-10	3.9676e-10	3.9676e-10	3.9676e-10
isobornyl isovalerate	1.3884e-09	1.3884e-09	1.3884e-09	1.3884e-09
furfuryl mercaptan	3.0212e-12	3.0212e-12	3.0212e-12	3.0212e-12
2-pentylfuran	1.5392e-09	1.5392e-09	1.5392e-09	1.5392e-09
difurfuryl disulfide	3.51e-13	3.51e-13	3.51e-13	3.51e-13
5-ethyl-4-hydroxy-2-methyl-3(2H)-furanone	9.1572e-12	9.1572e-12	9.1572e-13	9.1572e-13
5-methylfurfural	4.9101e-10	4.9101e-10	4.9101e-10	4.9101e-10
furfuryl methyl sulfide	1.20393e-09	1.20393e-09	1.20393e-09	1.20393e-09
2-methyl-3-tetrahydrofuranthiol	2.2841e-10	2.2841e-10	2.2841e-10	2.2841e-10
1-furfurylpyrrole	1.8317e-09	1.8317e-10	1.8317e-10	1.8317e-10
diacetyl	4.0326e-09	4.0326e-09	4.0326e-09	4.0326e-09
2-butanone	6.6534e-10	6.6534e-10	6.6534e-10	6.6534e-10
2-pentanone	2.8587e-09	2.8587e-09	2.8587e-09	2.8587e-09
4-methyl-3-penten-2-one	9.2365e-10	9.2365e-10	9.2365e-10	9.2365e-10
2-hexanone	1.01959e-09	1.01959e-09	1.01959e-09	1.01959e-09
3-hepten-2-one	2.0553e-09	2.0553e-09	2.0553e-09	2.0553e-09
5-methyl-2-hepten-4-one	9.5004e-10	9.5004e-10	9.5004e-10	9.5004e-10
2-octanone	1.4235e-10	1.4235e-10	1.4235e-10	1.4235e-10
3-octen-2-one	1.5834e-09	1.5834e-09	1.5834e-10	1.5834e-10
2-nonanone	4.9179e-10	4.9179e-10	4.9179e-10	4.9179e-10
1-hexanol	6.7158e-10	6.7158e-10	6.7158e-10	6.7158e-10
cis-3-hexenol	7.9183e-10	7.9183e-10	7.9183e-10	7.9183e-10
3-(methylthio)-1-hexanol	6.41065e-09	6.41065e-09	6.41065e-09	6.41065e-09
geraniol	1.21303e-09	1.21303e-09	1.21303e-09	1.21303e-09
champignol	4.0495e-10	4.0495e-10	4.0495e-10	4.0495e-10
ethyl maltol	1.6783e-11	1.6783e-12	1.6783e-12	1.6783e-12
(+-)-geosmin	4.3498e-11	4.3498e-11	4.3498e-11	4.3498e-11
ethylenediamine	1.17949e-10	1.17949e-10	1.17949e-09	1.17949e-10
butylamine	6.3167e-10	6.3167e-10	6.3167e-10	6.3167e-10
2-methylbutylamine	3.7427e-10	3.7427e-10	3.7427e-10	3.7427e-10
N-butyldimethylamine	3.2149e-10	3.2149e-10	3.2149e-10	3.2149e-10
isopentylamine	3.2084e-11	3.2084e-11	3.2084e-11	3.2084e-11
cadaverine	7.3242e-13	7.3242e-12	7.3242e-13	7.3242e-13
octylamine	7.3853e-11	7.3853e-11	7.3853e-10	7.3853e-11
N,N-dimethyloctylamine	6.0983e-12	6.0983e-11	6.0983e-12	6.0983e-11
cyclohexylamine	6.3024e-11	6.3024e-11	6.3024e-11	6.3024e-11
N,N-dimethylcyclohexylamine	2.2802e-11	2.2802e-11	2.2802e-11	2.2802e-11
phenethylamine	3.12e-13	3.12e-13	3.12e-13	3.12e-13
benzylamine	5.4353e-11	5.4353e-10	5.4353e-11	5.4353e-11
tyramine	2.2893e-09	2.2893e-09	2.2893e-09	2.2893e-09
N,N-dimethyl-2-phenethylamine	1.5262e-13	1.5262e-12	1.5262e-13	1.5262e-13
3-phenylpropylamine	9.7656e-12	9.7656e-13	9.7656e-12	9.7656e-12
N-methyl piperidine	2.0397e-10	2.0397e-10	2.0397e-10	2.0397e-10
2-acetylpyridine	3.6686e-10	3.6686e-11	3.6686e-11	3.6686e-11
4-tert-butylpyridine	3.8129e-12	3.8129e-12	3.8129e-12	3.8129e-12
5,6,7,8-tetrahydroquinoxaline	4.1964e-10	4.1964e-10	4.1964e-11	4.1964e-11
5-methylquinoxaline	3.51e-10	3.51e-10	3.51e-10	3.51e-10
indole	9.3093e-11	9.3093e-11	9.3093e-11	9.3093e-11
3-methylindole	1.755e-11	1.755e-10	1.755e-11	1.755e-11
5-methyl heptan-3-one oxime	3.1291e-09	3.1291e-09	3.1291e-10	3.1291e-10
gamma-undecalactone	3.1213e-09	3.1213e-09	3.1213e-09	3.1213e-09
pyrazine	1.4677e-09	1.4677e-09	1.4677e-09	1.4677e-09
2-acetylpyrazine	1.4339e-09	1.4339e-09	1.4339e-09	1.4339e-09
2-methylpyrazine	7.3008e-11	7.3008e-11	7.3008e-11	7.3008e-11
2-methoxypyrazine	3.2149e-11	3.2149e-11	3.2149e-11	3.2149e-11
2-ethylpyrazine	3.0368e-11	3.0368e-11	3.0368e-11	3.0368e-11
2,3-diethylpyrazine	6.3726e-09	6.3726e-09	6.3726e-10	6.3726e-10
2-chloropyrazine	1.8863e-09	1.8863e-09	1.8863e-09	1.8863e-09
2-methoxy-3-methylpyrazine	4.4525e-11	4.4525e-11	4.4525e-11	4.4525e-11
2-ethyl-3-methylpyrazine	4.6358e-11	4.6358e-11	4.6358e-11	4.6358e-11
2,3-dimethylpyrazine	2.6195e-09	2.6195e-10	2.6195e-10	2.6195e-10
2,5-dimethylpyrazine	3.0212e-10	3.0212e-10	3.0212e-10	3.0212e-10
2,6-dimethylpyrazine	2.9406e-09	2.9406e-09	2.9406e-09	2.9406e-09
2,3,5-trimethylpyrazine	1.313e-11	1.313e-11	1.313e-11	1.313e-11
2,3,5,6-tetramethylpyrazine	5.1155e-09	5.1155e-10	5.1155e-10	5.1155e-10
2-ethyl-5-methylpyrazine	1.4573e-11	1.4573e-11	1.4573e-11	1.4573e-11
2-ethyl-3-methoxypyrazine	1.20094e-11	1.20094e-11	1.20094e-10	1.20094e-11
2-methoxy-3(5 or 6)-isopropylpyrazine	2.7456e-10	2.7456e-10	2.7456e-11	2.7456e-11
2-isobutyl-3-methoxypyrazine	2.6559e-11	2.6559e-11	2.6559e-11	2.6559e-11
2-methoxy-3-(1-methylpropyl)pyrazine	2.6559e-11	2.6559e-11	2.6559e-12	2.6559e-11
2-isopropyl-3-methoxypyrazine	8.6216e-11	8.6216e-11	8.6216e-12	8.6216e-12
2-acetyl-3,(5 or 6)-dimethylpyrazine	2.2802e-09	2.2802e-10	2.2802e-09	2.2802e-09
2-isobutyl-3-methylpyrazine	2.3036e-10	2.3036e-10	2.3036e-10	2.3036e-10
2-acetyl-3-ethylpyrazine	1.9838e-10	1.9838e-10	1.9838e-10	1.9838e-10
2-acetyl-3-methylpyrazine	8.0119e-11	8.0119e-11	8.0119e-11	8.0119e-11
pyrazineethanethiol	4.3498e-11	4.3498e-11	4.3498e-11	4.3498e-11
5H-5-methyl-6,7-dihydrocyclopenta[b]pyrazine	2.2204e-10	2.2204e-10	2.2204e-10	2.2204e-10
benzaldehyde	7.6973e-11	7.6973e-11	7.6973e-11	7.6973e-11
trans-cinnamaldehyde	2.0605e-11	2.0605e-11	2.0605e-11	2.0605e-11
cuminaldehyde	4.4785e-10	4.4785e-11	4.4785e-11	4.4785e-11
p-anisaldehyde	7.6206e-12	7.6206e-12	7.6206e-12	7.6206e-12
vanillin	3.4112e-11	3.4112e-11	3.4112e-12	3.4112e-11
piperonal	2.2893e-12	2.2893e-12	2.2893e-13	2.2893e-12
acetophenone	2.4869e-11	2.4869e-11	2.4869e-12	2.4869e-12
2-hydroxyacetophenone	5.356e-12	5.356e-12	5.356e-12	5.356e-12
2,4-dimethylacetophenone	6.2257e-13	6.2257e-13	6.2257e-12	6.2257e-13
4-aminoacetophenone	3.2968e-10	3.2968e-10	3.2968e-10	3.2968e-10
4-methylacetophenone	6.8822e-12	6.8822e-12	6.8822e-12	6.8822e-12
4-methoxyacetophenone	4.5786e-13	4.5786e-13	4.5786e-13	4.5786e-13
2-methylacetophenone	1.21303e-12	1.21303e-12	1.21303e-12	1.21303e-12
propiophenone	9.8423e-12	9.8423e-12	9.8423e-12	9.8423e-12
butyrophenone	5.5705e-12	5.5705e-12	5.5705e-11	5.5705e-12
4-phenyl-2-butanone	4.9673e-10	4.9673e-11	4.9673e-11	4.9673e-11
4-(4-hydroxyphenyl)-2-butanone	7.631e-10	7.631e-10	7.631e-11	7.631e-11
methyl salicylate	4.0742e-11	4.0742e-11	4.0742e-11	4.0742e-11
methyl benzoate	2.8912e-11	2.8912e-11	2.8912e-11	2.8912e-11
benzyl acetate	1.4261e-10	1.4261e-10	1.4261e-10	1.4261e-10
ethyl benzoate	2.0371e-11	2.0371e-11	2.0371e-11	2.0371e-11
benzyl benzoate	4.2354e-11	4.2354e-11	4.2354e-11	4.2354e-11
methyl anthranilate	1.22096e-13	1.22096e-13	1.22096e-13	1.22096e-13
dimethyl anthranilate	1.5873e-11	1.5873e-11	1.5873e-11	1.5873e-11
phenylacetate	3.1876e-12	3.1876e-12	3.1876e-12	3.1876e-12
ethyl phenylacetate	6.9667e-11	6.9667e-11	6.9667e-11	6.9667e-11
allyl phenylacetate	1.9838e-10	1.9838e-10	1.9838e-11	1.9838e-11
phenyl propionate	1.404e-11	1.404e-11	1.404e-11	1.404e-11
4-methylanisole	9.1429e-11	9.1429e-11	9.1429e-11	9.1429e-11
m-cresol	1.27413e-10	1.27413e-10	1.27413e-10	1.27413e-10
guaiacol	9.2326e-12	9.2326e-13	9.2326e-13	9.2326e-13
2,6-dimethoxyphenol	2.3426e-12	2.3426e-12	2.3426e-12	2.3426e-12
eugenol	7.2345e-13	7.2345e-13	7.2345e-13	7.2345e-13
isoeugenol	7.631e-13	7.631e-13	7.631e-13	7.631e-13
methyl eugenol	2.0605e-12	2.0605e-12	2.0605e-12	2.0605e-12
methyl isoeugenol	8.3941e-12	8.3941e-12	8.3941e-13	8.3941e-13
eugenyl acetate	3.6244e-10	3.6244e-10	3.6244e-11	3.6244e-11
elemicin	5.34171e-12	5.34171e-12	5.34171e-12	5.34171e-12
carvacrol	2.2893e-09	2.2893e-09	2.2893e-09	2.2893e-09
coumarin	7.6297e-10	7.6297e-10	7.6297e-10	7.6297e-10
2-isobutylthiazole	3.0433e-12	3.0433e-12	3.0433e-12	3.0433e-12
2-acetylthiazole	1.4118e-10	1.4118e-10	1.4118e-10	1.4118e-10
2-isopropyl-4-methylthiazole	2.7768e-12	2.7768e-12	2.7768e-12	2.7768e-12
2-methyl-2-thiazoline	3.8285e-09	3.8285e-10	3.8285e-10	3.8285e-10
2,4,5-trimethylthiazole	4.5214e-12	4.5214e-12	4.5214e-12	4.5214e-12
ethyl-2,5-dihydro-4-methylthiazole	6.2205e-10	6.2205e-10	6.2205e-11	6.2205e-11
4-methylthiazole	7.5556e-10	7.5556e-10	7.5556e-10	7.5556e-10
dimethyl trisulfide	8.138e-10	8.138e-10	8.138e-10	8.138e-10
allyl disulfide	7.3541e-10	7.3541e-10	7.3541e-10	7.3541e-10
4-methoxy-2-methyl-2-butanethiol	2.5116e-12	2.5116e-12	2.5116e-12	2.5116e-12
2-methyl-4-propyl-1,3-oxathiane	9.3847e-11	9.3847e-11	9.3847e-11	9.3847e-11
fenchol	5.265e-10	5.265e-10	5.265e-10	5.265e-10
terrasol	6.1126e-11	6.1126e-11	6.1126e-11	6.1126e-11
alpha-pinene	3.0511e-09	3.0511e-09	3.0511e-09	3.0511e-09
1,8-cineole	1.4469e-09	1.4469e-09	1.4469e-09	1.4469e-09
(R)-(+)-limonene	1.10435e-09	1.10435e-09	1.10435e-09	1.10435e-09
L-carvone	9.919e-11	9.919e-11	9.919e-11	9.919e-11
beta-ionone	1.29727e-10	1.29727e-10	1.29727e-11	1.29727e-11
beta-damascone	9.7682e-12	9.7682e-12	9.7682e-12	9.7682e-12
damascenone	1.5639e-10	1.5639e-10	1.5639e-10	1.5639e-10
(+-)-menthol	5.8526e-11	5.8526e-11	5.8526e-11	5.8526e-11
menthone	2.8223e-10	2.8223e-10	2.8223e-10	2.8223e-10
(R)-(+)-pulegone	7.0954e-13	7.0954e-13	7.0954e-13	7.0954e-13
(+)-menthofuran	2.288e-10	2.288e-10	2.288e-10	2.288e-10
(+)-isomenthone	1.9526e-10	1.9526e-10	1.9526e-10	1.9526e-10
(+)-neomenthol	2.4414e-10	2.4414e-10	2.4414e-10	2.4414e-10
nootkatone	9.386e-10	9.386e-10	9.386e-10	9.386e-10
(-)-ambroxide	6.8679e-10	6.8679e-10	6.8679e-10	6.8679e-10
myrcene	1.8252e-09	1.8252e-09	1.8252e-09	1.8252e-09
1,3,5-undecatriene	4.6358e-09	4.6358e-09	4.6358e-09	4.6358e-09

## Sheet: min eff concs
	Minimal effective concentrations per ROI
ROI #	mols/L	ppb	ppb = (mols/L) * 24.45 * 1e9
	7.6973e-11	1.88199
	6.2257e-13	0.01522
	2.2893e-12	0.05597
	5.356e-12	0.13095
	1.4235e-10	3.48046
	1.22096e-13	0.00299
	3.1876e-12	0.07794
	1.27413e-10	3.11525
	7.631e-13	0.01866
	5.4665e-12	0.13366
	8.6866e-12	0.21239
	1.3351e-11	0.32643
	8.9271e-11	2.18268
	5.4665e-12	0.13366
	2.1203e-11	0.51841
	7.631e-10	18.6578
	4.3498e-11	1.06353
	4.3498e-11	1.06353
	3.51e-13	0.00858
	2.5116e-12	0.06141
	7.3242e-13	0.01791
	6.0983e-12	0.1491
	9.3093e-11	2.27612
	4.0326e-09	98.5971
	1.4573e-11	0.35631
	8.0119e-11	1.95891
	1.20094e-11	0.29363
	9.1572e-12	0.22389
	2.7768e-12	0.06789
	3.4112e-11	0.83404
	6.0983e-12	0.1491
	3.12e-13	0.00763
	3.12e-13	0.00763
	9.1572e-12	0.22389
	4.0495e-10	9.90103
	5.5484e-11	1.35658
	5.4665e-12	0.13366
	2.0605e-11	0.50379
	5.4665e-12	0.13366
	5.4665e-12	0.13366
	9.1572e-12	0.22389
	2.1359e-09	52.2228
	2.0397e-10	4.98707
	9.1572e-12	0.22389
	9.1572e-12	0.22389
	9.1572e-12	0.22389
	2.0397e-10	4.98707
	1.755e-11	0.4291
	2.7768e-12	0.06789
	2.0371e-11	0.49807
	1.4573e-11	0.35631
	2.0397e-10	4.98707
	7.6297e-10	18.6546
	7.3242e-13	0.01791
	9.1572e-12	0.22389
	2.3426e-12	0.05728
	9.1572e-12	0.22389
	9.2326e-12	0.22574
	9.2326e-12	0.22574
	3.51e-10	8.58195
	1.29727e-10	3.17183
	4.5786e-13	0.01119
	1.3351e-10	3.26432
	2.0605e-11	0.50379
	1.07536e-09	26.2925
	9.0883e-11	2.22209
	3.8129e-12	0.09323
	2.3426e-12	0.05728
	5.8526e-11	1.43096
	5.8526e-11	1.43096
	4.0495e-10	9.90103
	6.3024e-11	1.54094
	3.12e-13	0.00763
	2.3426e-12	0.05728
	9.386e-10	22.9488
	5.265e-10	12.8729
	1.313e-11	0.32103
	3.2149e-10	7.86043
	7.6297e-10	18.6546
	2.6559e-11	0.64937
	2.0371e-11	0.49807
	1.4235e-10	3.48046
	7.3853e-11	1.80571
	9.386e-10	22.9488
	1.21303e-12	0.02966
	5.4353e-11	1.32893
	1.755e-11	0.4291
	4.4785e-10	10.9499
	4.5786e-13	0.01119
	9.7682e-12	0.23883
	6.2257e-13	0.01522
	8.3941e-12	0.20524
	1.9838e-10	4.85039
	7.2345e-13	0.01769
	1.10435e-09	27.0014
	3.0368e-11	0.7425
	4.9101e-10	12.0052
	1.404e-11	0.34328
	1.21303e-09	29.6586
	3.7427e-10	9.1509
	1.313e-11	0.32103
	2.3036e-10	5.6323
	2.6559e-11	0.64937
	2.2204e-10	5.42888
	2.2893e-12	0.05597
	4.0742e-11	0.99614
	8.3941e-12	0.20524
	1.5873e-11	0.38809
	9.2326e-12	0.22574
	9.2326e-12	0.22574
	1.29727e-10	3.17183
	1.29727e-10	3.17183
	7.6973e-11	1.88199
	6.2257e-13	0.01522
	2.2893e-12	0.05597
	5.356e-12	0.13095
	1.4235e-10	3.48046
	3.1876e-12	0.07794
	1.27413e-10	3.11525
	6.9667e-11	1.70336
	7.631e-13	0.01866
	5.34171e-12	0.1306
	5.4665e-12	0.13366
	8.6866e-12	0.21239
	1.00334e-11	0.24532
	8.9271e-11	2.18268
	1.24956e-11	0.30552
	5.4665e-12	0.13366
	2.1203e-11	0.51841
	7.631e-10	18.6578
	4.3498e-11	1.06353
	4.3498e-11	1.06353
	3.51e-13	0.00858
	2.5116e-12	0.06141
	7.3242e-13	0.01791
	6.0983e-12	0.1491
	1.755e-11	0.4291
	4.0326e-09	98.5971
	1.4573e-11	0.35631
	8.0119e-11	1.95891
	1.20094e-11	0.29363
	7.0954e-13	0.01735
	2.7768e-12	0.06789
	3.4112e-11	0.83404
	7.3242e-13	0.01791
	5.4665e-12	0.13366
	1.9526e-10	4.77411
	5.4665e-12	0.13366
	3.12e-13	0.00763
	2.0397e-10	4.98707
	2.0371e-11	0.49807
	9.1572e-12	0.22389
	9.1572e-12	0.22389
	9.1572e-12	0.22389
	2.3426e-12	0.05728
	9.1572e-12	0.22389
	1.21303e-09	29.6586
	2.1359e-09	52.2228
	2.3426e-12	0.05728
	9.0883e-11	2.22209
	2.1203e-11	0.51841
	7.2345e-13	0.01769
	9.1572e-12	0.22389
	3.12e-13	0.00763
	1.4235e-10	3.48046
	2.6559e-11	0.64937
	4.4785e-10	10.9499
	4.9101e-10	12.0052
	3.7388e-12	0.09141
	9.7682e-12	0.23883
	7.6297e-10	18.6546
	2.3426e-12	0.05728
	7.6297e-10	18.6546
	1.29727e-10	3.17183
	2.7768e-12	0.06789
	1.755e-11	0.4291
	2.0397e-10	4.98707
	6.2257e-13	0.01522
	8.3941e-12	0.20524
	2.2204e-10	5.42888
	3.8285e-09	93.6068
	4.9179e-10	12.0243
	2.0605e-12	0.05038
	1.4235e-10	3.48046
	4.2952e-10	10.5018
	9.2326e-12	0.22574
	7.2345e-13	0.01769
	2.3426e-12	0.05728
	1.9838e-10	4.85039
	2.1203e-11	0.51841
	1.27413e-10	3.11525
	9.0883e-11	2.22209
	4.4785e-10	10.9499
	4.4785e-10	10.9499
	1.8317e-09	44.7851
	2.288e-10	5.59416
	1.4235e-10	3.48046
	4.0495e-10	9.90103
	4.0495e-10	9.90103
	1.4235e-10	3.48046
	5.8526e-11	1.43096
	2.4414e-10	5.96922
	1.8252e-11	0.44626
	7.3853e-11	1.80571
	2.3036e-10	5.6323
	3.51e-10	8.58195
	1.4573e-11	0.35631
	4.4785e-10	10.9499
	4.4785e-10	10.9499
	1.4573e-11	0.35631
	2.3426e-12	0.05728
	2.0397e-10	4.98707
	3.12e-13	0.00763
	5.5484e-11	1.35658
	9.1572e-12	0.22389
	4.0326e-09	98.5971
	2.6559e-11	0.64937
	9.2326e-12	0.22574
	9.2326e-12	0.22574
	4.4785e-10	10.9499
	7.2345e-13	0.01769
	2.6559e-11	0.64937
	4.5786e-13	0.01119
	4.5786e-13	0.01119
	2.8223e-10	6.90052
	4.5786e-13	0.01119
	1.5873e-11	0.38809
	2.0605e-11	0.50379
	5.4665e-12	0.13366
	6.2257e-13	0.01522
	7.9183e-10	19.3602
	2.8223e-10	6.90052
	3.7427e-10	9.1509
	2.2893e-12	0.05597
	3.4112e-11	0.83404
	6.2257e-13	0.01522
	2.8912e-11	0.7069
	1.22096e-13	0.00299
	6.1126e-11	1.49453
	2.288e-10	5.59416
	1.9526e-10	4.77411
	2.5116e-12	0.06141
	7.6973e-11	1.88199
	6.2257e-13	0.01522
	2.2893e-12	0.05597
	1.22096e-13	0.00299
	7.631e-10	18.6578
	1.22096e-13	0.00299
	3.1876e-12	0.07794
	1.27413e-10	3.11525
	7.631e-13	0.01866
	5.4665e-12	0.13366
	8.6866e-12	0.21239
	1.3351e-11	0.32643
	8.9271e-11	2.18268
	1.24956e-11	0.30552
	7.8286e-11	1.91409
	2.1203e-11	0.51841
	7.631e-10	18.6578
	4.3498e-11	1.06353
	4.3498e-11	1.06353
	3.51e-13	0.00858
	2.5116e-12	0.06141
	7.3242e-12	0.17908
	6.0983e-11	1.49103
	9.3093e-11	2.27612
	4.0326e-09	98.5971
	3.0368e-11	0.7425
	1.20094e-11	0.29363
	7.0954e-13	0.01735
	2.7768e-12	0.06789
	3.4112e-11	0.83404
	1.4573e-11	0.35631
	4.9179e-10	12.0243
	9.7682e-12	0.23883
	5.4665e-12	0.13366
	2.7768e-12	0.06789
	6.0983e-11	1.49103
	4.0495e-10	9.90103
	7.3853e-11	1.80571
	3.12e-13	0.00763
	3.2084e-11	0.78445
	2.0397e-10	4.98707
	4.9673e-11	1.2145
	2.0397e-10	4.98707
	4.9673e-11	1.2145
	3.8285e-10	9.36068
	2.2204e-10	5.42888
	4.5786e-13	0.01119
	1.9838e-10	4.85039
	7.6297e-10	18.6546
	4.5786e-13	0.01119
	5.265e-10	12.8729
	4.0742e-11	0.99614
	8.3941e-12	0.20524
	1.9838e-10	4.85039
	2.3426e-12	0.05728
	9.1572e-12	0.22389
	3.12e-13	0.00763
	9.1572e-12	0.22389
	9.2326e-13	0.02257
	3.51e-10	8.58195
	2.2893e-12	0.05597
	1.4573e-11	0.35631
	5.4665e-12	0.13366
	9.0883e-11	2.22209
	2.0605e-11	0.50379
	2.0605e-11	0.50379
	3.1876e-12	0.07794
	2.0605e-11	0.50379
	5.1129e-09	125.01
	1.27413e-10	3.11525
	2.1359e-09	52.2228
	2.5116e-12	0.06141
	3.51e-13	0.00858
	3.8129e-12	0.09323
	2.288e-10	5.59416
	2.288e-10	5.59416
	3.6686e-11	0.89697
	4.0326e-09	98.5971
	1.9526e-10	4.77411
	1.599e-10	3.90956
	5.8526e-11	1.43096
	5.8526e-11	1.43096
	9.3847e-11	2.29456
	2.4414e-10	5.96922
	6.0983e-11	1.49103
	2.2204e-10	5.42888
	9.2326e-13	0.02257
	1.22096e-13	0.00299
	6.3024e-11	1.54094
	8.3941e-12	0.20524
	2.2893e-09	55.9734
	1.22096e-13	0.00299
	1.29727e-10	3.17183
	9.0883e-11	2.22209
	1.00334e-11	0.24532
	4.0326e-09	98.5971
	9.3847e-11	2.29456
	9.1572e-12	0.22389
	9.1572e-12	0.22389
	9.1572e-12	0.22389
	7.6973e-11	1.88199
	6.2257e-13	0.01522
	2.2893e-12	0.05597
	5.356e-12	0.13095
	1.4235e-10	3.48046
	1.22096e-13	0.00299
	3.1876e-12	0.07794
	1.27413e-10	3.11525
	6.9667e-11	1.70336
	7.631e-13	0.01866
	5.34171e-12	0.1306
	5.4665e-12	0.13366
	8.6866e-12	0.21239
	1.3351e-11	0.32643
	8.9271e-11	2.18268
	1.24956e-11	0.30552
	7.8286e-11	1.91409
	2.1203e-11	0.51841
	7.631e-10	18.6578
	4.3498e-11	1.06353
	4.3498e-11	1.06353
	3.51e-13	0.00858
	2.5116e-12	0.06141
	7.3242e-12	0.17908
	6.0983e-11	1.49103
	9.3093e-11	2.27612
	4.0326e-09	98.5971
	3.0368e-11	0.7425
	3.6686e-11	0.89697
	1.20094e-11	0.29363
	7.0954e-13	0.01735
	2.7768e-12	0.06789
	1.5873e-11	0.38809
	5.4665e-12	0.13366
	6.0983e-11	1.49103
	4.0495e-10	9.90103
	2.7768e-12	0.06789
	2.0397e-10	4.98707
	9.1572e-12	0.22389
	3.12e-13	0.00763
	1.755e-10	4.29098
	2.0397e-10	4.98707
	2.6559e-11	0.64937
	4.9673e-11	1.2145
	3.12e-13	0.00763
	5.4665e-12	0.13366
	3.2084e-11	0.78445
	3.2084e-11	0.78445
	5.4665e-12	0.13366
	9.1572e-12	0.22389
	1.29727e-10	3.17183
	2.2204e-10	5.42888
	5.8526e-11	1.43096
	1.4573e-11	0.35631
	1.9838e-10	4.85039
	1.9838e-10	4.85039
	4.9179e-10	12.0243
	1.27413e-10	3.11525
	4.5786e-13	0.01119
	3.51e-10	8.58195
	7.631e-13	0.01866
	1.5834e-09	38.7141
	2.3426e-12	0.05728
	9.1572e-12	0.22389
	7.6297e-10	18.6546
	2.0605e-11	0.50379
	7.3242e-12	0.17908
	9.1572e-12	0.22389
	9.1572e-12	0.22389
	7.2345e-13	0.01769
	2.6559e-11	0.64937
	2.4869e-11	0.60805
	9.2326e-13	0.02257
	8.6216e-11	2.10798
	9.1572e-12	0.22389
	9.0883e-11	2.22209
	5.4665e-12	0.13366
	2.0605e-11	0.50379
	2.0605e-11	0.50379
	5.1129e-09	125.01
	1.27413e-10	3.11525
	4.9101e-10	12.0052
	1.8317e-10	4.47851
	9.2326e-13	0.02257
	2.288e-10	5.59416
	4.5786e-13	0.01119
	3.7427e-10	9.1509
	1.9526e-10	4.77411
	3.0433e-12	0.07441
	7.3853e-11	1.80571
	5.8526e-11	1.43096
	7.9183e-10	19.3602
	3.12e-13	0.00763
	1.22096e-13	0.00299
	8.6216e-11	2.10798
	2.6559e-11	0.64937
	1.313e-11	0.32103
	2.3426e-12	0.05728
	4.0742e-11	0.99614
	2.5116e-12	0.06141
	9.386e-10	22.9488
	5.4665e-12	0.13366
	1.313e-11	0.32103
	1.4573e-11	0.35631
	2.0605e-12	0.05038
	8.3941e-12	0.20524
	2.0605e-12	0.05038
	2.0605e-11	0.50379
	2.2893e-12	0.05597
	1.5834e-09	38.7141
	4.0742e-11	0.99614
	3.7388e-12	0.09141
	2.0605e-11	0.50379
	9.1572e-12	0.22389
	9.7682e-12	0.23883
	7.6973e-11	1.88199
	1.21303e-12	0.02966
	2.2893e-13	0.0056
	5.356e-12	0.13095
	7.631e-11	1.86578
	1.22096e-13	0.00299
	3.1876e-12	0.07794
	1.27413e-10	3.11525
	1.9838e-11	0.48504
	7.631e-13	0.01866
	5.34171e-12	0.1306
	5.4665e-12	0.13366
	8.6866e-12	0.21239
	1.00334e-11	0.24532
	8.9271e-11	2.18268
	1.24956e-11	0.30552
	7.8286e-11	1.91409
	2.1203e-11	0.51841
	7.631e-10	18.6578
	4.3498e-11	1.06353
	2.5116e-12	0.06141
	8.9271e-11	2.18268
	4.0326e-09	98.5971
	4.1964e-11	1.02602
	7.0954e-13	0.01735
	2.7768e-12	0.06789
	3.4112e-12	0.0834
	2.2802e-11	0.55751
	4.1964e-11	1.02602
	9.1572e-13	0.02239
	1.755e-11	0.4291
	5.265e-10	12.8729
	8.3941e-13	0.02052
	1.29727e-11	0.31718
	1.9838e-10	4.85039
	3.51e-10	8.58195
	2.0605e-11	0.50379
	3.12e-13	0.00763
	3.12e-13	0.00763
	6.1126e-11	1.49453
	5.4665e-12	0.13366
	1.9838e-11	0.48504
	9.1572e-13	0.02239
	9.1572e-13	0.02239
	4.2354e-11	1.03556
	1.9838e-10	4.85039
	2.3426e-12	0.05728
	2.3426e-12	0.05728
	4.9101e-10	12.0052
	2.0605e-11	0.50379
	3.6244e-11	0.88617
	5.4665e-12	0.13366
	2.0605e-11	0.50379
	7.3853e-10	18.0571
	1.6055e-11	0.39254
	5.4665e-12	0.13366
	1.3351e-10	3.26432
	2.418e-09	59.1201
	1.27413e-10	3.11525
	5.1129e-09	125.01
	2.1359e-09	52.2228
	7.631e-13	0.01866
	4.9673e-11	1.2145
	3.7388e-12	0.09141
	4.9101e-10	12.0052
	4.9673e-11	1.2145
	2.0605e-12	0.05038
	2.4414e-10	5.96922
	9.7682e-12	0.23883
	1.5639e-10	3.82374
	6.3024e-11	1.54094
	2.0553e-09	50.2521
	1.6783e-12	0.04103
	5.8526e-11	1.43096
	5.8526e-11	1.43096
	2.6559e-11	0.64937
	4.3498e-11	1.06353
	1.21303e-09	29.6586
	7.9183e-10	19.3602
	9.7682e-12	0.23883
	7.631e-13	0.01866
	3.2084e-11	0.78445
	7.3853e-10	18.0571
	6.3726e-10	15.581
	2.6559e-12	0.06494
	2.6559e-12	0.06494
	1.313e-11	0.32103
	1.9838e-10	4.85039
	1.313e-11	0.32103
	2.6559e-11	0.64937
	1.5873e-11	0.38809
	7.2345e-13	0.01769
	7.2345e-13	0.01769
	9.919e-11	2.4252
	3.8129e-12	0.09323
	7.6206e-12	0.18632
	9.1572e-13	0.02239
	1.6783e-12	0.04103
	2.3426e-12	0.05728
	2.0605e-11	0.50379
	9.2326e-13	0.02257
	5.4665e-12	0.13366
	5.4665e-12	0.13366
	5.4665e-12	0.13366
	4.5786e-13	0.01119
	3.7388e-12	0.09141
	3.12e-13	0.00763
	6.0983e-12	0.1491
	2.0397e-10	4.98707
	2.0397e-10	4.98707
	6.2257e-12	0.15222
	2.3426e-12	0.05728
	2.3426e-12	0.05728
	2.0605e-12	0.05038
	2.2893e-09	55.9734
	7.6297e-10	18.6546
	7.6297e-10	18.6546
	2.7768e-12	0.06789
	3.0511e-09	74.5994
	9.386e-10	22.9488
	4.5786e-13	0.01119
	1.22096e-13	0.00299
	7.6973e-11	1.88199
	1.21303e-12	0.02966
	2.2893e-13	0.0056
	5.356e-12	0.13095
	7.631e-11	1.86578
	1.22096e-13	0.00299
	3.1876e-12	0.07794
	1.27413e-10	3.11525
	1.9838e-11	0.48504
	7.631e-13	0.01866
	5.34171e-12	0.1306
	5.4665e-12	0.13366
	8.6866e-12	0.21239
	1.00334e-11	0.24532
	8.9271e-11	2.18268
	1.24956e-11	0.30552
	7.8286e-11	1.91409
	2.1203e-11	0.51841
	7.631e-10	18.6578
	4.3498e-11	1.06353
	3.51e-13	0.00858
	2.5116e-12	0.06141
	6.0983e-12	0.1491
	8.9271e-11	2.18268
	3.0368e-11	0.7425
	1.29727e-11	0.31718
	7.0954e-13	0.01735
	2.7768e-12	0.06789
	3.4112e-12	0.0834
	6.3024e-11	1.54094
	2.6559e-12	0.06494
	3.2084e-11	0.78445
	2.0397e-10	4.98707
	2.6559e-12	0.06494
	4.5786e-13	0.01119
	8.3941e-13	0.02052
	9.1572e-13	0.02239
	9.1429e-11	2.23544
	5.265e-10	12.8729
	4.9101e-10	12.0052
	1.9838e-10	4.85039
	5.1129e-09	125.01
	3.6244e-11	0.88617
	1.27413e-10	3.11525
	4.9179e-10	12.0243
	1.9838e-10	4.85039
	1.404e-11	0.34328
	4.2354e-11	1.03556
	9.919e-11	2.4252
	1.27413e-10	3.11525
	6.3726e-10	15.581
	1.9838e-10	4.85039
	2.3426e-12	0.05728
	2.2802e-11	0.55751
	2.6559e-11	0.64937
	3.6244e-11	0.88617
	7.9183e-10	19.3602
	2.0605e-11	0.50379
	9.1572e-13	0.02239
	2.0605e-11	0.50379
	2.0605e-11	0.50379
	4.9101e-10	12.0052
	9.1572e-13	0.02239
	3.12e-13	0.00763
	1.9838e-10	4.85039
	2.0605e-11	0.50379
	1.9838e-11	0.48504
	4.9101e-10	12.0052
	2.1359e-09	52.2228
	7.0954e-13	0.01735
	9.1572e-13	0.02239
	3.6244e-11	0.88617
	2.0605e-11	0.50379
	9.919e-11	2.4252
	1.9526e-10	4.77411
	8.138e-10	19.8974
	7.6206e-12	0.18632
	5.4665e-12	0.13366
	2.1203e-11	0.51841
	1.8252e-11	0.44626
	7.6206e-12	0.18632
	5.4665e-12	0.13366
	5.4665e-12	0.13366
	4.0742e-11	0.99614
	3.7388e-12	0.09141
	1.8317e-10	4.47851
	2.288e-10	5.59416
	4.9101e-10	12.0052
	4.9673e-11	1.2145
	2.8223e-10	6.90052
	1.5639e-10	3.82374
	1.5639e-10	3.82374
	4.0326e-09	98.5971
	2.0553e-09	50.2521
	4.5786e-13	0.01119
	2.0553e-09	50.2521
	5.4665e-12	0.13366
	2.6559e-11	0.64937
	6.1126e-11	1.49453
	6.1126e-11	1.49453
	5.8526e-11	1.43096
	1.9526e-10	4.77411
	7.631e-13	0.01866
	7.3853e-10	18.0571
	2.2893e-09	55.9734
	3.1213e-09	76.3158
	2.6559e-12	0.06494
	2.6559e-12	0.06494
	7.2345e-13	0.01769
	1.313e-11	0.32103
	1.9838e-10	4.85039
	1.6783e-12	0.04103
	3.8129e-12	0.09323
	9.2326e-13	0.02257
	2.3426e-12	0.05728
	9.8423e-12	0.24064
	7.6297e-10	18.6546
	2.7768e-12	0.06789
	3.0511e-09	74.5994
	2.0605e-12	0.05038
	3.51e-10	8.58195
	9.1572e-13	0.02239
	2.1359e-09	52.2228
	9.7682e-12	0.23883
	2.3426e-12	0.05728
	4.5786e-13	0.01119
	5.8526e-11	1.43096
	5.4665e-12	0.13366
	4.0326e-09	98.5971
	6.3167e-10	15.4443
	3.2084e-11	0.78445
	2.0397e-10	4.98707
	7.2345e-13	0.01769
	1.9838e-10	4.85039
	6.2257e-12	0.15222
	9.386e-10	22.9488
	4.2354e-11	1.03556
	6.2257e-13	0.01522
	2.2893e-12	0.05597
	5.356e-12	0.13095
	4.9673e-11	1.2145
	1.22096e-13	0.00299
	3.1876e-12	0.07794
	1.27413e-10	3.11525
	6.9667e-11	1.70336
	7.631e-13	0.01866
	5.34171e-12	0.1306
	5.4665e-12	0.13366
	8.6866e-12	0.21239
	1.00334e-11	0.24532
	8.9271e-11	2.18268
	1.24956e-11	0.30552
	7.8286e-11	1.91409
	2.1203e-11	0.51841
	7.631e-10	18.6578
	4.3498e-11	1.06353
	4.3498e-11	1.06353
	3.51e-13	0.00858
	2.5116e-12	0.06141
	7.3242e-13	0.01791
	6.0983e-11	1.49103
	9.3093e-11	2.27612
	4.0326e-09	98.5971
	3.0368e-11	0.7425
	4.1964e-11	1.02602
	8.6216e-12	0.2108
	7.0954e-13	0.01735
	2.7768e-12	0.06789
	3.4112e-11	0.83404
	9.1572e-13	0.02239
	5.4665e-12	0.13366
	5.4665e-12	0.13366
	3.51e-13	0.00858
	1.3351e-10	3.26432
	2.1359e-09	52.2228
	5.1129e-09	125.01
	4.9673e-11	1.2145
	4.9179e-10	12.0243
	3.7388e-12	0.09141
	9.1572e-13	0.02239
	4.9101e-10	12.0052
	1.5262e-13	0.00373
	1.8317e-10	4.47851
	4.0326e-09	98.5971
	4.5786e-13	0.01119
	9.919e-11	2.4252
	4.5786e-13	0.01119
	4.0495e-10	9.90103
	4.9673e-11	1.2145
	7.9183e-10	19.3602
	5.8526e-11	1.43096
	1.6783e-12	0.04103
	1.6783e-12	0.04103
	1.6783e-12	0.04103
	3.12e-13	0.00763
	7.3242e-13	0.01791
	2.0397e-10	4.98707
	2.0397e-10	4.98707
	4.1964e-11	1.02602
	4.1964e-11	1.02602
	3.1291e-10	7.65065
	1.4573e-11	0.35631
	1.313e-11	0.32103
	1.9838e-10	4.85039
	2.0605e-11	0.50379
	2.6559e-11	0.64937
	7.2345e-13	0.01769
	2.6559e-11	0.64937
	1.9838e-10	4.85039
	2.2893e-12	0.05597
	1.4261e-10	3.48681
	6.9667e-11	1.70336
	2.3426e-12	0.05728
	2.0605e-12	0.05038
	3.7427e-10	9.1509
	4.0326e-09	98.5971
	7.6297e-10	18.6546
	7.6297e-10	18.6546
	2.7768e-12	0.06789
	3.8285e-10	9.36068
	5.265e-10	12.8729
	5.265e-10	12.8729
	3.0511e-09	74.5994
	2.4414e-10	5.96922
	9.386e-10	22.9488
	9.386e-10	22.9488
	5.4665e-12	0.13366
	2.1203e-11	0.51841
	1.13477e-09	27.7451
	2.3426e-12	0.05728
	2.0605e-11	0.50379
	7.8286e-11	1.91409
	9.0883e-11	2.22209
	3.0433e-12	0.07441
	2.5116e-12	0.06141
	7.2345e-13	0.01769
	1.8317e-10	4.47851
	2.288e-10	5.59416
	9.1429e-11	2.23544
	1.29727e-11	0.31718
	9.7682e-12	0.23883
	9.7682e-12	0.23883
	3.7427e-10	9.1509
	2.1138e-11	0.51682
	2.2893e-09	55.9734
	3.12e-13	0.00763
	1.4573e-11	0.35631
	1.5873e-11	0.38809
	4.2354e-11	1.03556
	9.2326e-13	0.02257
	9.2326e-13	0.02257
	4.2354e-11	1.03556
	2.2893e-12	0.05597
	9.7682e-12	0.23883
	7.2345e-13	0.01769
	5.4665e-12	0.13366
	4.9101e-10	12.0052
	1.4469e-09	35.3767
	4.6358e-09	113.345
	2.1359e-09	52.2228
	3.51e-13	0.00858
	7.3853e-11	1.80571
	1.6055e-11	0.39254
	3.12e-13	0.00763
	2.1203e-11	0.51841
	1.9838e-10	4.85039
	1.9838e-10	4.85039
	2.9406e-09	71.8977
	4.0742e-11	0.99614
	9.7682e-12	0.23883
	1.6055e-11	0.39254
	3.0368e-11	0.7425
	1.313e-11	0.32103
	4.0742e-11	0.99614
	9.2326e-13	0.02257
	1.9526e-10	4.77411
	7.6973e-11	1.88199
	1.22096e-13	0.00299
	4.5786e-13	0.01119
	5.356e-12	0.13095
	4.9673e-11	1.2145
	3.1876e-12	0.07794
	1.27413e-10	3.11525
	6.9667e-11	1.70336
	7.631e-13	0.01866
	5.34171e-12	0.1306
	5.4665e-12	0.13366
	8.6866e-12	0.21239
	1.00334e-11	0.24532
	8.9271e-11	2.18268
	1.24956e-11	0.30552
	7.8286e-11	1.91409
	2.1203e-11	0.51841
	7.631e-10	18.6578
	4.3498e-11	1.06353
	3.51e-13	0.00858
	2.5116e-12	0.06141
	7.3242e-13	0.01791
	6.0983e-11	1.49103
	9.3093e-11	2.27612
	4.0326e-09	98.5971
	3.0368e-11	0.7425
	4.1964e-11	1.02602
	8.6216e-12	0.2108
	7.0954e-13	0.01735
	2.7768e-12	0.06789
	3.4112e-11	0.83404
	9.1572e-13	0.02239
	5.4665e-12	0.13366
	5.4665e-12	0.13366
	3.51e-13	0.00858
	1.3351e-10	3.26432
	3.6244e-11	0.88617
	5.1129e-09	125.01
	4.9673e-11	1.2145
	4.9179e-10	12.0243
	3.7388e-12	0.09141
	1.6783e-12	0.04103
	4.9101e-10	12.0052
	3.12e-13	0.00763
	1.8317e-10	4.47851
	4.0326e-09	98.5971
	4.5786e-13	0.01119
	9.8423e-12	0.24064
	4.5786e-13	0.01119
	4.0495e-10	9.90103
	4.9673e-11	1.2145
	7.9183e-10	19.3602
	3.1213e-09	76.3158
	1.6783e-12	0.04103
	1.6783e-12	0.04103
	1.6783e-12	0.04103
	3.12e-13	0.00763
	7.3242e-13	0.01791
	2.0397e-10	4.98707
	2.0397e-10	4.98707
	3.6686e-11	0.89697
	4.1964e-11	1.02602
	3.1291e-10	7.65065
	1.4573e-11	0.35631
	1.313e-11	0.32103
	1.9838e-10	4.85039
	2.0605e-11	0.50379
	2.6559e-11	0.64937
	1.6055e-11	0.39254
	2.6559e-11	0.64937
	1.9838e-10	4.85039
	7.6206e-12	0.18632
	1.4261e-10	3.48681
	6.9667e-11	1.70336
	2.3426e-12	0.05728
	2.0605e-12	0.05038
	8.3941e-13	0.02052
	2.2893e-09	55.9734
	7.6297e-10	18.6546
	7.6297e-10	18.6546
	2.7768e-12	0.06789
	2.7768e-12	0.06789
	5.265e-10	12.8729
	5.265e-10	12.8729
	3.0511e-09	74.5994
	2.4414e-10	5.96922
	3.6244e-11	0.88617
	9.386e-10	22.9488
	2.0605e-11	0.50379
	5.8526e-11	1.43096
	9.2326e-13	0.02257
	9.7682e-12	0.23883
	6.3024e-11	1.54094
	1.8252e-11	0.44626
	3.1213e-09	76.3158
	3.0433e-12	0.07441
	1.9838e-10	4.85039
	3.7388e-12	0.09141
	4.2952e-10	10.5018
	3.4112e-11	0.83404
	1.20393e-09	29.4361
	1.5639e-10	3.82374
	6.3726e-10	15.581
	5.8526e-11	1.43096
	1.21303e-09	29.6586
	4.9101e-10	12.0052
	1.27413e-10	3.11525
	2.3426e-12	0.05728
	3.1213e-09	76.3158
	4.1964e-11	1.02602
	1.4573e-11	0.35631
	2.6559e-11	0.64937
	4.5214e-12	0.11055
	9.2326e-13	0.02257
	7.6297e-10	18.6546
	2.1359e-09	52.2228
	2.0605e-11	0.50379
	9.3093e-11	2.27612
	9.8423e-12	0.24064
	9.386e-10	22.9488
	2.418e-09	59.1201
	1.8317e-10	4.47851
	7.3853e-11	1.80571
	2.6559e-11	0.64937
	6.2257e-13	0.01522
	9.8423e-12	0.24064
	4.0742e-11	0.99614
	4.0742e-11	0.99614
	1.5873e-11	0.38809
	1.27413e-10	3.11525
	4.3498e-11	1.06353
	1.29727e-11	0.31718
	2.0605e-12	0.05038
	3.7427e-10	9.1509
	1.22096e-13	0.00299
