# Supplementary material for: Mapping odorant sensitivities reveals a sparse but structured representation of olfactory chemical space by sensory input to the mouse olfactory bulb
Source: eLife. 2022 Jul 21;11:e80470. doi: 10.7554/eLife.80470 (PMC9352350; doi:10.7554/eLife.80470)
Supplement: Figure 6—source data 2. [file elife-80470-fig6-data2.xlsx]

## Sheet: Sheet1
Min radius of significant Ripley's K (Fig. 6B)
	Acids	Aldehyd	Esters	Ketone	Alcohol	Aromatic Ald	Aromatic K/E/E	Aromatic P/M	Alkene	Cyclic Terpenoid	Cyclic Alcohol	Furan	Amine	heterocyclic NS	pyrazine	thiol/sulfide
classnum	1	2	3	4	5	6	7	8	9	10		12	13	14	15	16
OB	min. radius (K)
1	116.583	NaN	NaN	NaN	NT	0	208.413	281.876	NT	368.116	NT	176.472	172.479	393.668	71.8664	NT	Note: 0 = never reaches p<0.01 significance level.
2	109.568	NaN	0	0	NT	150.855	176.262	161.177	NT	396.193	NT	161.971	203.257	252.484	159.589	NT	NaN = not enough glomeruli to perform test (<3 glomeruli)
3	222.134	NaN	0	271.712	NT	304.549	255.615	117.828	NT	122.979	NT	242.738	107.526	0	152.597	NT
4	222.134	NaN	0	271.712	NT	304.549	255.615	117.828	NT	122.979	NT	233.08	107.526	0	152.597	NT
5	123.873	NaN	NaN	NaN	NT	159.266	336.227	68.6611	NT	300.835	NT	179.085	243.499	225.095	285.97	NT
6	94.4182	NaN	NaN	NaN	NT	342.811	93.6919	159.058	NT	139.448	NT	225.877	299.233	210.625	167.048	NT
7	59.9728	NaN	NaN	78.5559	NT	0	111.499	147.82	NT	154.578	NT	115.722	125.014	0	59.1281	NT
8	166.987	NaN	NaN	376.467	NT	345.902	258.681	159.532	NT	213.207	NT	269.863	205.007	99.1486	59.1281	NT
