# Supplementary material for: Mapping odorant sensitivities reveals a sparse but structured representation of olfactory chemical space by sensory input to the mouse olfactory bulb
Source: eLife journal article supplement (doi:10.7554/elife.80470), 2022-07-21
Supplement: supp4 [file elife-80470-supp4-v2.pdf]

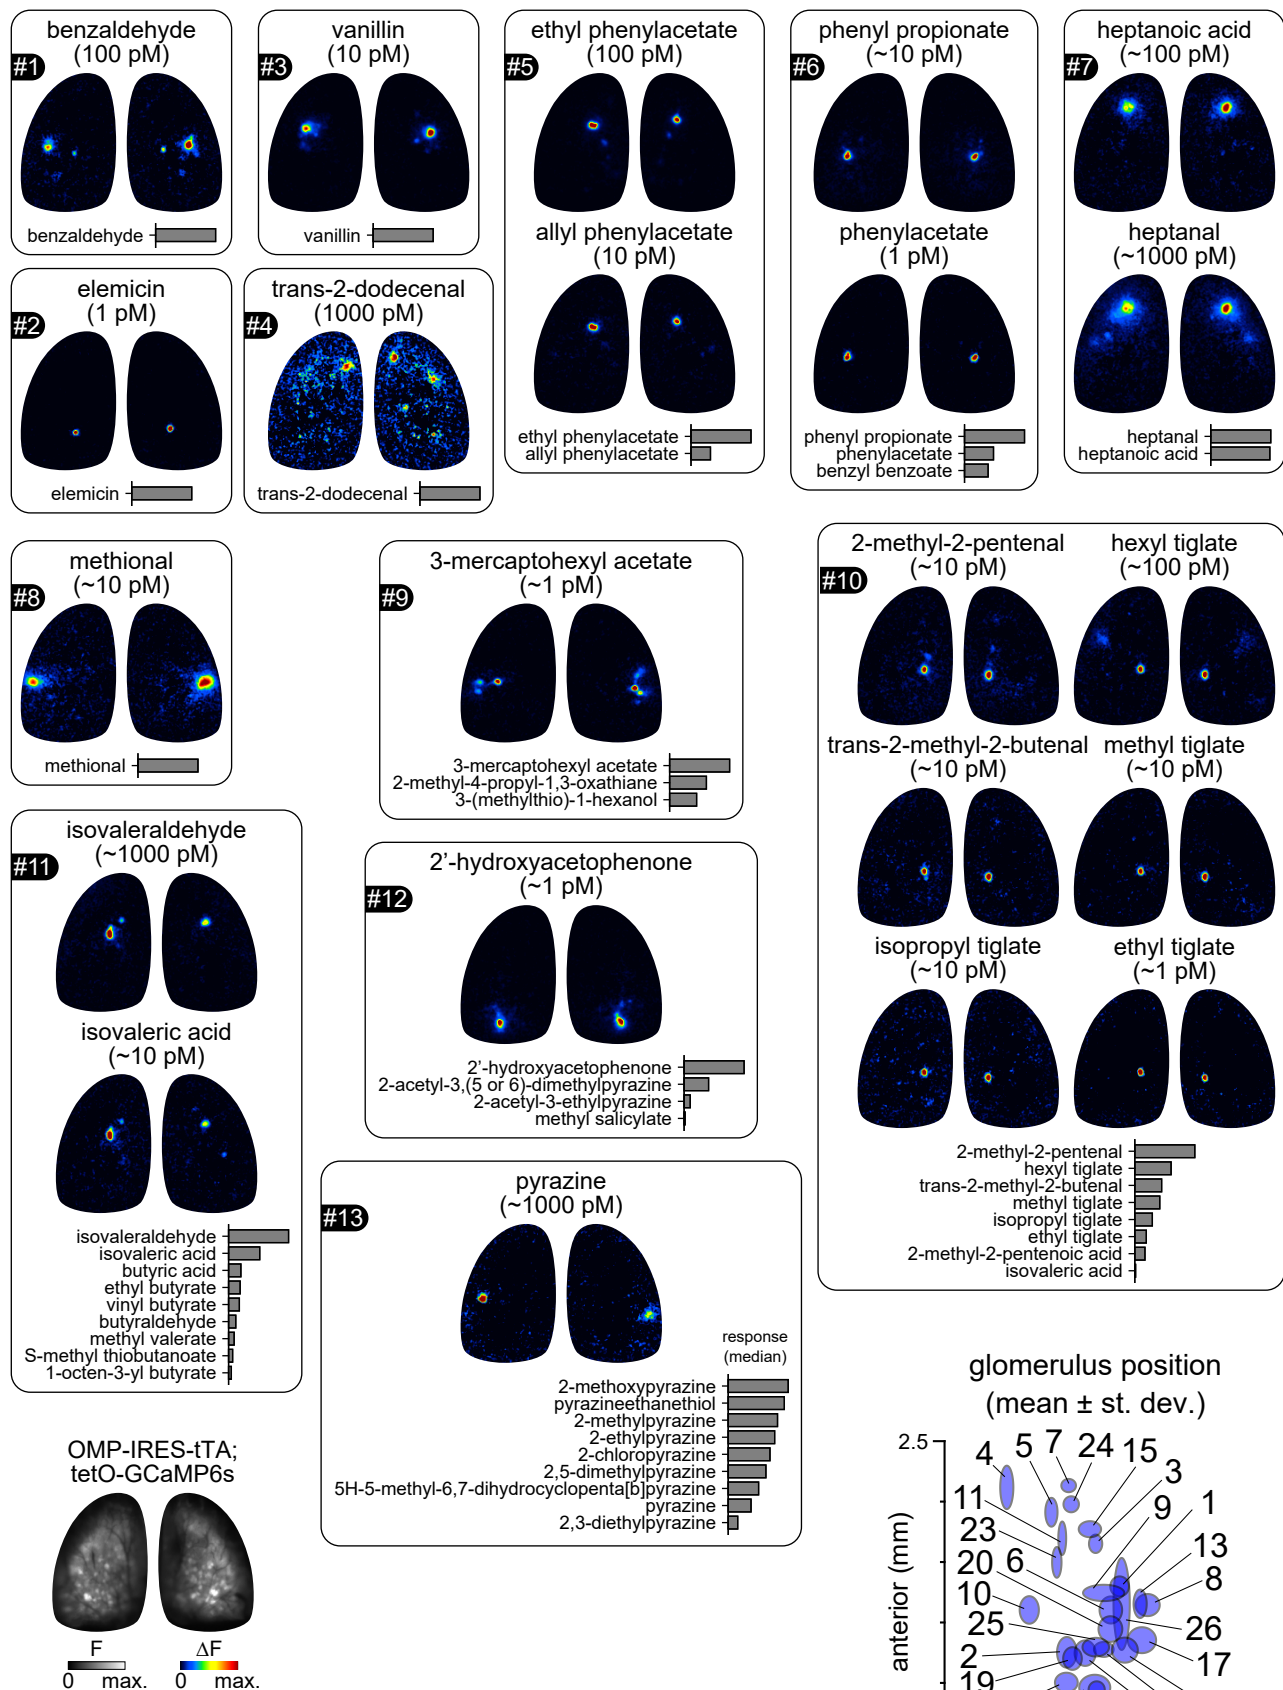

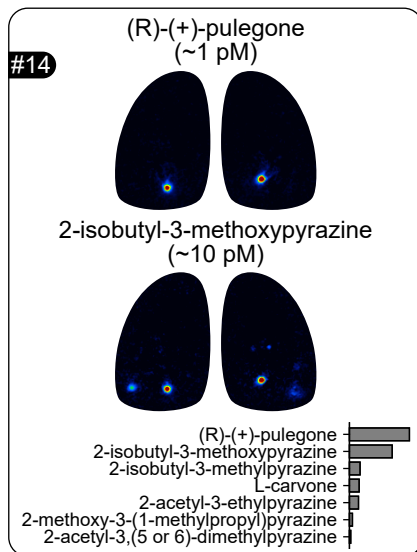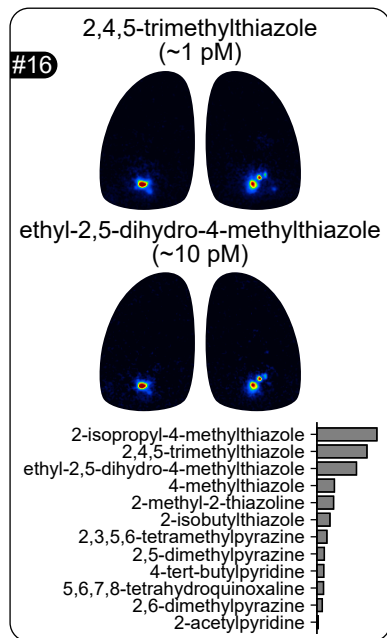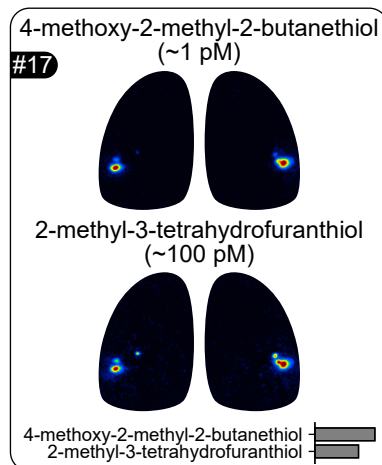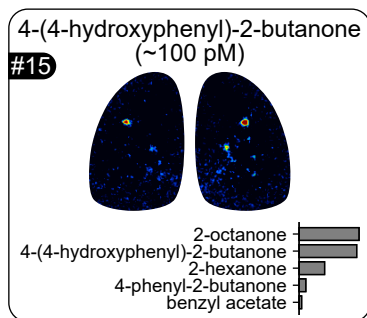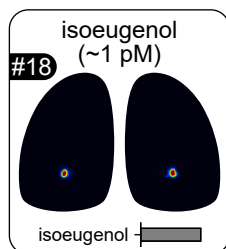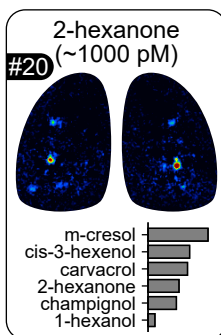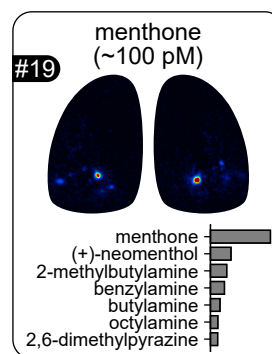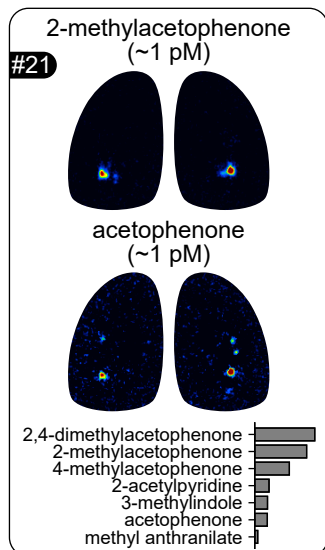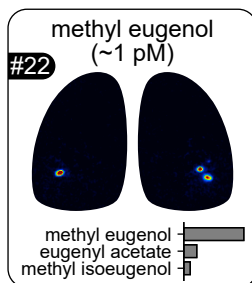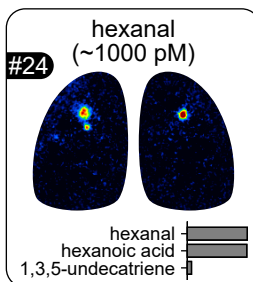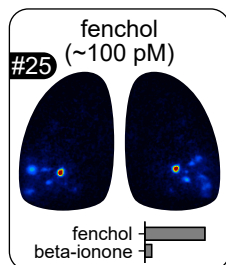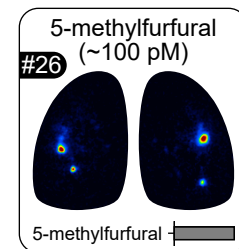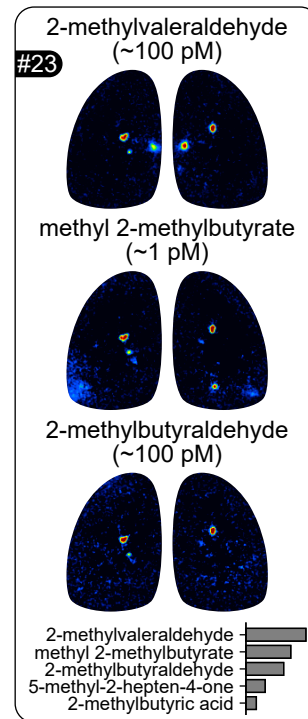

#### **Supplementary File 4. Atlas of Functionally Identified Glomeruli.**

Compilation of diagnostic odorants and example response maps for each of the 26 functionally-identified glomeruli (see Text and Table 1). Concentrations are given as estimated delivered concentration, rounded to the nearest order of magnitude. See Supplementary File 1 for more precise estimates of delivered concentration. Bar plots indicate relative response magnitudes evoked by all effective odorants for each glomerulus, taken from the median response spectrum across the 8 OBs. Positions of each glomerulus are shown in lower right of p. 1, reproduced from Fig. 2.
